# Supplementary material for: Probing halogen bonding interactions between heptafluoro-2-iodopropane and three azabenzenes with Raman spectroscopy and density functional theory
Source: Royal Society of Chemistry journal article supplement (doi:10.1039/d2cp00463a), 2022-01-01
Supplement: d2cp00463a1.pdf [file d2cp00463a1.pdf]

## Supporting Information

### **Probing halogen bonding interactions between heptafluoro-2-iodopropane and three azabenzenes with Raman spectroscopy and density functional theory**

Ethan C. Lambert, Ashley E. Williams, Ryan C. Fortenberry, and Nathan I. Hammer\*

*Department of Chemistry and Biochemistry, University of Mississippi, University, Mississippi 38655, United States*

---

# Table of Contents

|                                                                                 |     |
|---------------------------------------------------------------------------------|-----|
| Cartesian coordinates of the optimized complexes .....                          | S3  |
| Simulated Raman spectra at all levels of theory compared to<br>experiment ..... | S6  |
| Experimental and simulated Raman spectrum of HFP···Pyridine .....               | S10 |
| Experimental and simulated Raman spectrum of HFP···Pyrimidine .                 | S12 |
| Experimental and simulated Raman spectrum of HFP···Pyridazine ..                | S14 |
| Numbered molecular structures .....                                             | S16 |
| Natural Electron Configurations .....                                           | S17 |
| HFP displacement vectors .....                                                  | S20 |

**Table S1:** Cartesian coordinates (in Å) of the HFP...Pyridine complex optimized at the M06-2X/aVTZ level of theory.

| Atom | X        | Y        | Z        |
|------|----------|----------|----------|
| C    | 3.802068 | -1.16662 | 0.094547 |
| C    | 5.18654  | -1.21566 | 0.187816 |
| C    | 5.895577 | -0.02197 | 0.179192 |
| C    | 5.193936 | 1.171822 | 0.077706 |
| C    | 3.809163 | 1.122976 | -0.01104 |
| N    | 3.123837 | -0.02178 | -0.00299 |
| H    | 6.974755 | -0.02203 | 0.250233 |
| H    | 3.212322 | -2.07507 | 0.097913 |
| H    | 5.690831 | -2.16833 | 0.265122 |
| H    | 5.70413  | 2.124421 | 0.06713  |
| H    | 3.22507  | 2.03152  | -0.09146 |
| C    | -2.48726 | 1.30687  | 0.125385 |
| C    | -1.89155 | -0.02731 | -0.3887  |
| C    | -2.49676 | -1.28009 | 0.2921   |
| F    | -1.97507 | -2.39163 | -0.24351 |
| F    | -2.25443 | -1.29039 | 1.608692 |
| F    | -3.82617 | -1.33958 | 0.115604 |
| F    | -2.2185  | -0.11171 | -1.71708 |
| F    | -1.95764 | 2.336691 | -0.54805 |
| F    | -2.24437 | 1.484184 | 1.429942 |
| F    | -3.81625 | 1.352976 | -0.05804 |
| I    | 0.303777 | -0.0219  | -0.17851 |

**Table S2:** Cartesian coordinates (in Å) of the HFP...Pyrimidine complex optimized at the M06-2X/aVTZ level of theory.

| Atom | X        | Y        | Z        |
|------|----------|----------|----------|
| C    | 0.033867 | -2.96342 | 0.07551  |
| C    | 1.229725 | -4.85655 | 0.394219 |
| C    | 1.655651 | -4.39225 | 1.630694 |
| C    | 1.195435 | -3.14472 | 2.020007 |
| N    | 0.38277  | -2.42502 | 1.244477 |
| H    | 1.545469 | -5.82272 | 0.018164 |
| H    | -0.62604 | -2.37728 | -0.55256 |
| H    | 2.313487 | -4.97322 | 2.260122 |
| H    | 1.477876 | -2.70577 | 2.969367 |
| C    | -1.34923 | 2.196281 | 4.321934 |
| C    | -1.17218 | 2.176039 | 2.781752 |

|   |          |          |          |
|---|----------|----------|----------|
| C | -2.43167 | 2.638217 | 2.004444 |
| F | -2.18196 | 2.645769 | 0.689171 |
| F | -3.47436 | 1.831502 | 2.234409 |
| F | -2.78626 | 3.884604 | 2.351475 |
| F | -0.18374 | 3.077512 | 2.492407 |
| F | -0.20499 | 1.84002  | 4.920009 |
| F | -2.31369 | 1.357112 | 4.717311 |
| F | -1.66267 | 3.425079 | 4.759175 |
| I | -0.55016 | 0.176838 | 2.110423 |
| N | 0.417888 | -4.14739 | -0.39048 |

**Table S3:** Cartesian coordinates (in Å) of the HFP...Pyridazine complex optimized at the M06-2X/aVTZ level of theory.

| Atom | X        | Y        | Z        |
|------|----------|----------|----------|
| C    | -1.38585 | 1.990148 | 4.399675 |
| C    | -1.03835 | 2.029251 | 2.889999 |
| C    | -2.10792 | 2.74343  | 2.025197 |
| F    | -1.71043 | 2.789089 | 0.747759 |
| F    | -3.28703 | 2.112976 | 2.081442 |
| F    | -2.296   | 4.009984 | 2.429602 |
| F    | 0.109375 | 2.769843 | 2.776755 |
| F    | -0.39059 | 1.412628 | 5.086018 |
| F    | -2.51199 | 1.30442  | 4.628957 |
| F    | -1.54566 | 3.22684  | 4.896794 |
| I    | -0.67003 | -0.00331 | 2.133112 |
| N    | -0.02011 | -2.63327 | 1.205538 |
| C    | 0.948852 | -3.3543  | 1.761086 |
| C    | 1.277832 | -4.63485 | 1.327379 |
| C    | 0.548753 | -5.14639 | 0.276166 |
| C    | -0.45117 | -4.33715 | -0.25792 |
| N    | -0.72522 | -3.11787 | 0.194953 |
| H    | 2.072277 | -5.19175 | 1.803498 |
| H    | 1.470259 | -2.87685 | 2.580258 |
| H    | 0.735004 | -6.13223 | -0.12602 |
| H    | -1.0665  | -4.6677  | -1.08435 |

**Table S4:** Cartesian coordinates (in Å) of HFP optimized at the M06-2X/aVTZ level of theory.

| Atom | X        | Y        | Z        |
|------|----------|----------|----------|
| C    | -0.92415 | 1.296886 | 0.00245  |
| C    | 0.594177 | 1.300067 | 0.03931  |
| C    | 1.155121 | -0.11084 | 0.002398 |
| F    | 0.746785 | -0.80286 | 1.097581 |
| F    | -1.41498 | 0.660703 | 1.097627 |
| F    | -1.36437 | 0.65434  | -1.10984 |
| F    | -1.39345 | 2.569538 | -0.02043 |
| F    | 0.721977 | -0.75819 | -1.10988 |
| F    | 2.511041 | -0.07391 | -0.02055 |
| F    | 1.01416  | 1.920441 | -1.13987 |
| I    | 1.319992 | 2.372061 | 1.763694 |

**Table S5:** Cartesian coordinates (in Å) of Pyridine optimized at the M06-2X/aVTZ level of theory.

| Atom | X        | Y        | Z        |
|------|----------|----------|----------|
| C    | -0.69026 | -0.8943  | 0.00000  |
| C    | 0.71662  | -0.8943  | 0.00000  |
| C    | 1.38331  | 0.3323   | 0.00000  |
| C    | 0.62923  | 1.50709  | -0.00024 |
| C    | -0.77397 | 1.40428  | -0.00038 |
| N    | -1.4335  | 0.22933  | -0.00020 |
| H    | 2.48185  | 0.37208  | -0.00095 |
| H    | -1.25581 | -1.84313 | 0.00012  |
| H    | 1.27135  | -1.84121 | 0.00026  |
| H    | 1.11327  | 2.49201  | -0.00034 |
| H    | -1.40732 | 2.30935  | -0.00046 |

**Table S6:** Cartesian coordinates (in Å) of Pyrimidine optimized at the M06-2X/aVTZ level of theory.

| Atom | X        | Y        | Z        |
|------|----------|----------|----------|
| C    | -0.50386 | -0.71241 | 0.00000  |
| N    | 0.85725  | -0.71241 | 0.00000  |
| C    | 1.44513  | 0.50232  | 0.00000  |
| C    | 0.7019   | 1.69859  | 0.00000  |
| C    | -0.70106 | 1.57567  | -0.00002 |
| N    | -1.32035 | 0.37665  | 0.00003  |
| H    | 2.54973  | 0.51154  | -0.00002 |
| H    | -1.0002  | -1.70491 | -0.00003 |
| H    | 1.19178  | 2.67806  | 0.00000  |
| H    | -1.35629 | 2.465    | -0.00002 |

**Table S7:** Cartesian coordinates (in Å) of Pyridazine optimized at the M06-2X/aVTZ level of theory.

| Atom | X        | Y        | Z        |
|------|----------|----------|----------|
| N    | -1.93365 | -0.75381 | 0.00000  |
| C    | -0.56704 | -0.75381 | 0.00000  |
| C    | 0.17774  | 0.44049  | 0.00000  |
| C    | -0.54103 | 1.63871  | 0.00000  |
| C    | -1.94533 | 1.54378  | -0.00001 |
| N    | -2.58863 | 0.33804  | -0.00001 |
| H    | 1.27493  | 0.42371  | -0.00001 |
| H    | -0.08341 | -1.74412 | -0.00002 |
| H    | -0.03938 | 2.61464  | 0.00001  |
| H    | -2.59137 | 2.43666  | -0.00002 |

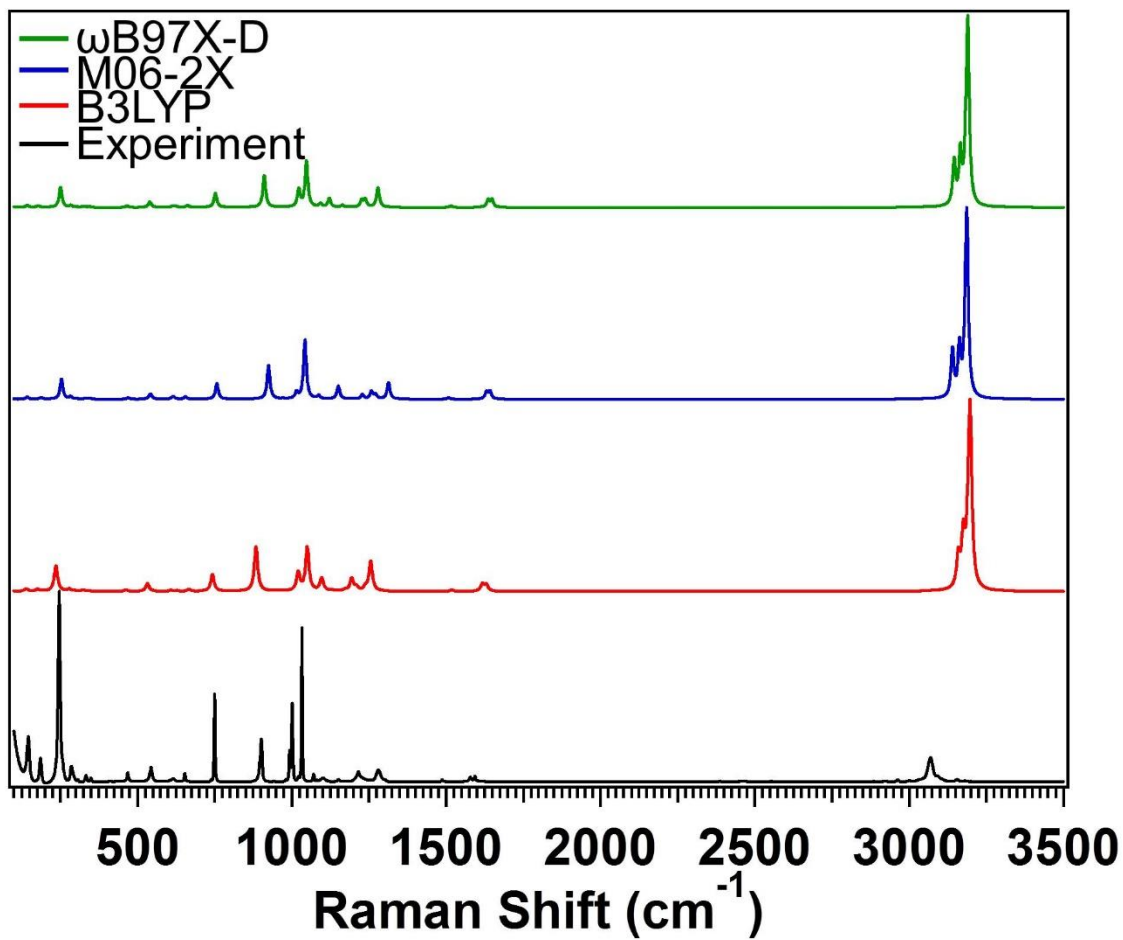

**Figure S1.** Theoretical Raman spectra of the HFP...Pyridine complex with the B3LYP, M06-2X, and  $\omega$ B97X-D methods and aVTZ basis set compared to experimental results.

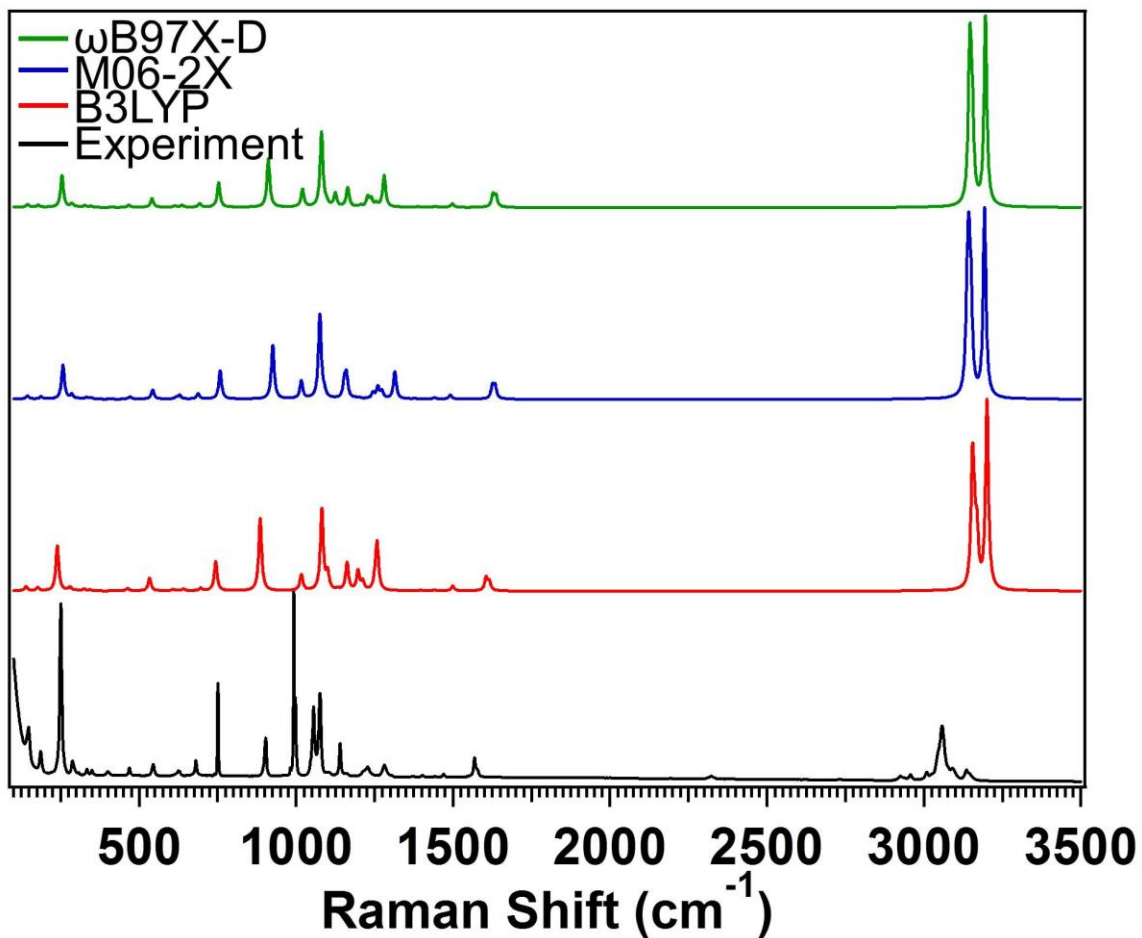

**Figure S2.** Theoretical Raman spectra of the HFP...Pyrimidine complex with the B3LYP, M06-2X, and  $\omega$ B97X-D methods and aVTZ basis set compared to experimental results.



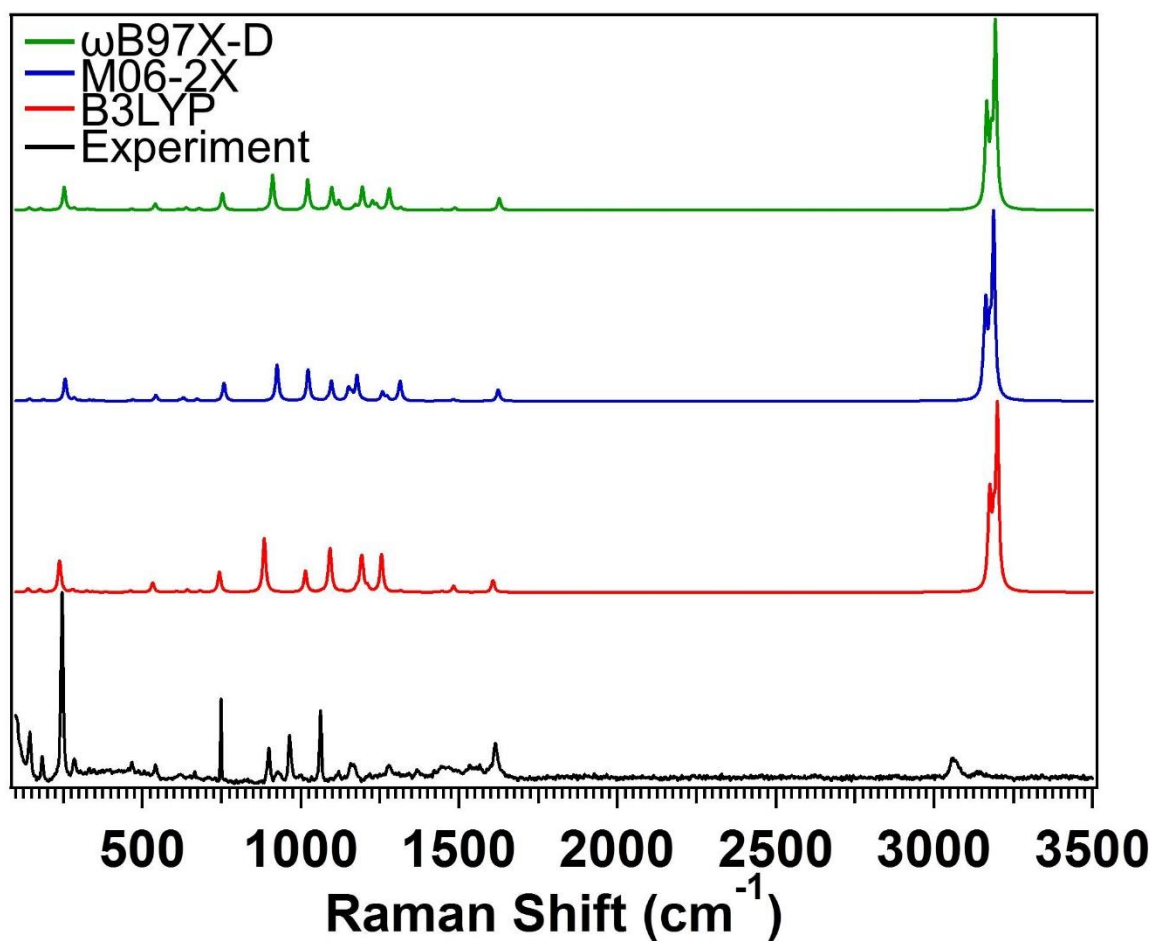

**Figure S3.** Theoretical Raman spectra of the HFP...Pyridazine complex with the B3LYP, M06-2X, and  $\omega$ B97X-D methods and aVTZ basis set compared to experimental results.

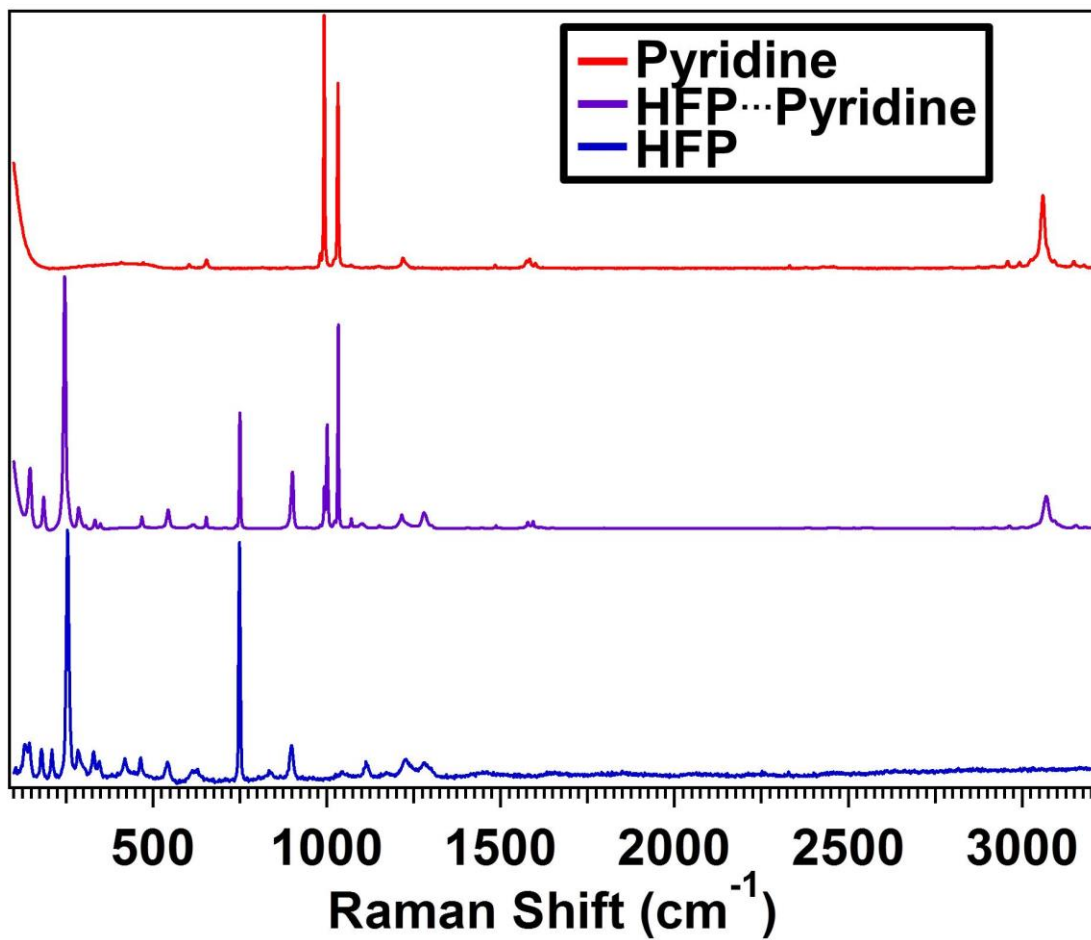

**Figure S4.** Raman spectrum of the HFP...Pyridine complex (purple) compared to the individual molecules' spectra (pyridine, red; HFP blue).

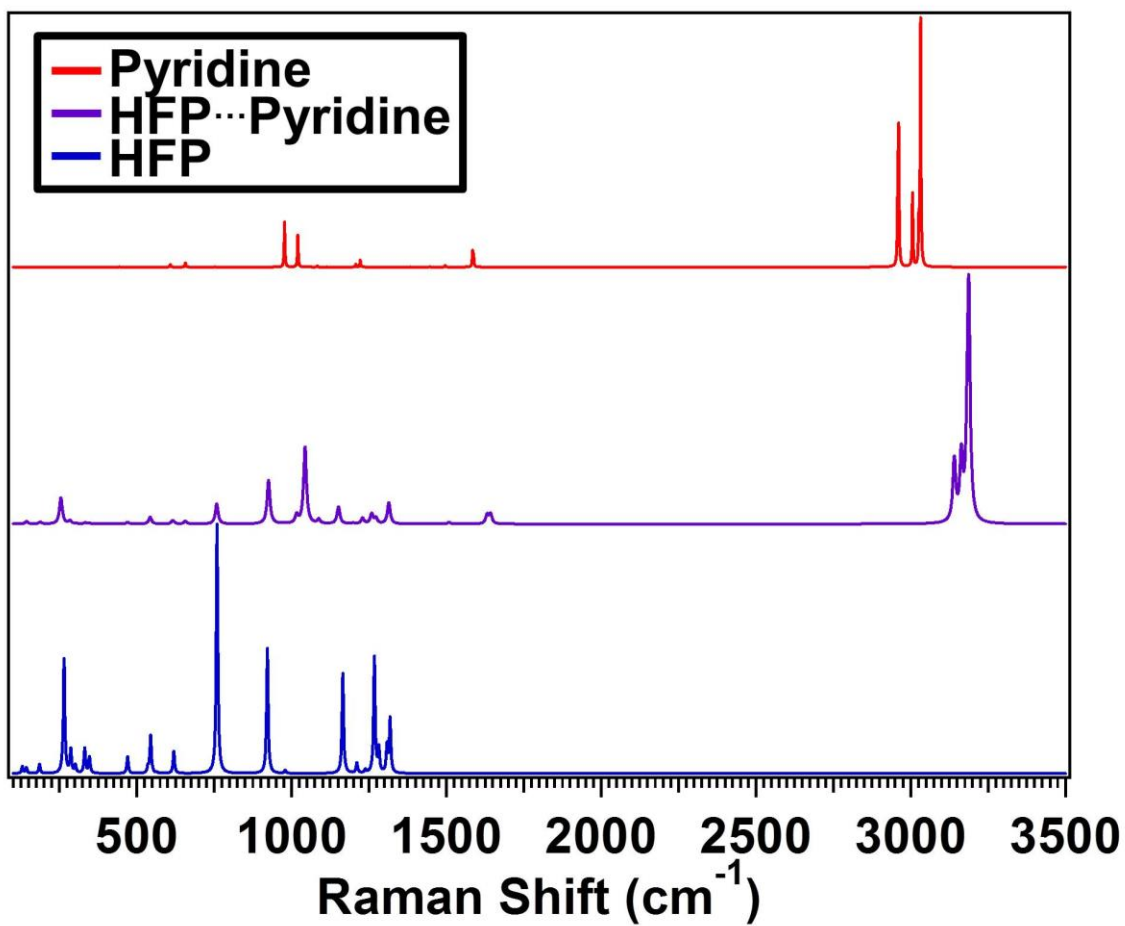

**Figure S5.** Theoretical Raman spectrum of the HFP...Pyridine complex (purple) compared to the individual molecules' spectra (pyridine, red; HFP blue) all at the M06-2X/aVTZ level of theory.

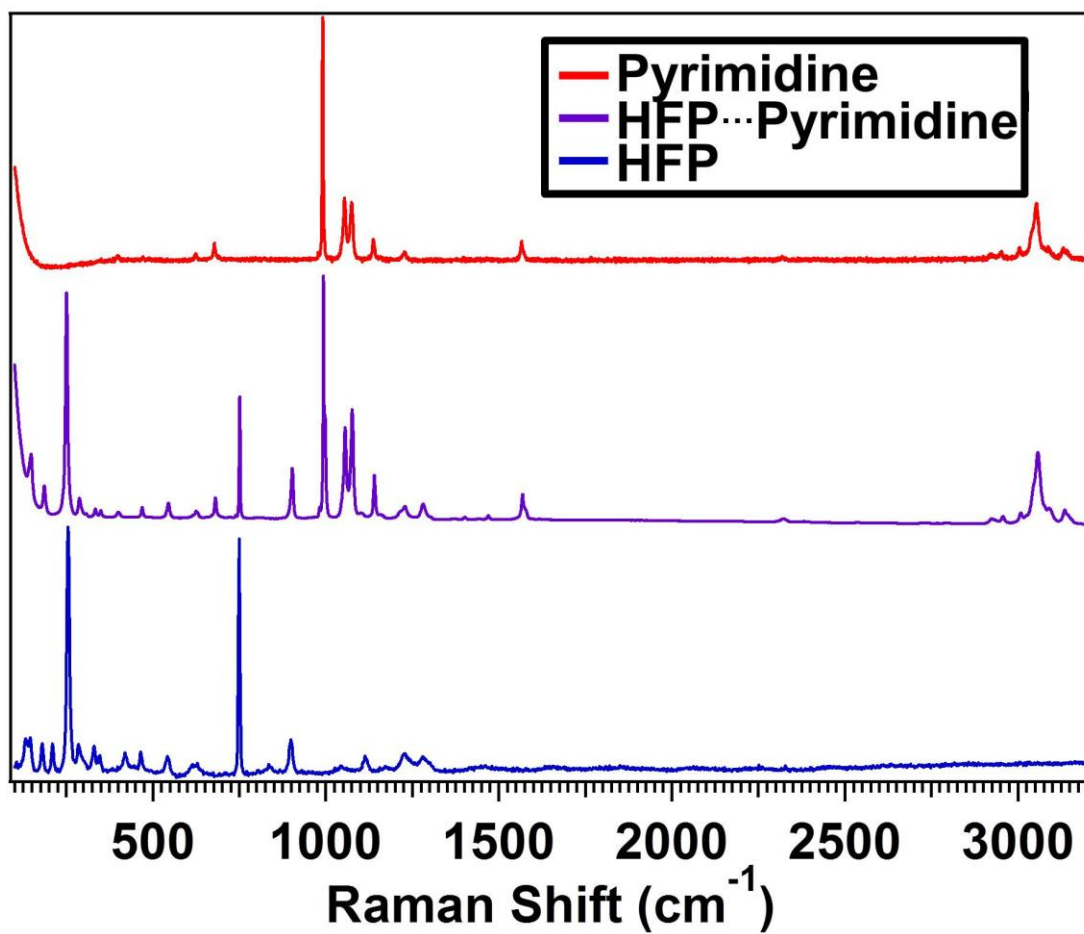

**Figure S6.** Raman spectrum of the HFP...Pyrimidine complex (purple) compared to the individual molecules' spectra (pyrimidine, red; HFP blue).

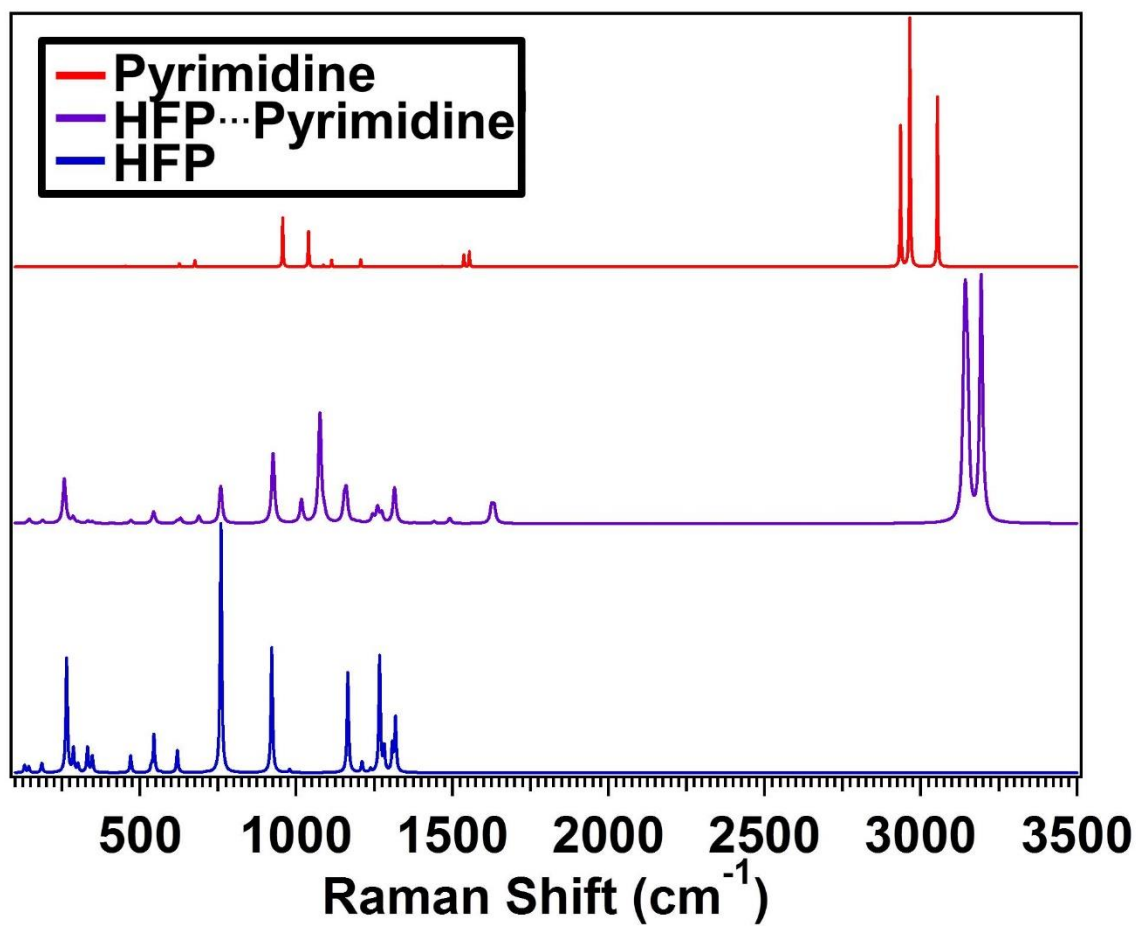

**Figure S7.** Theoretical Raman spectrum of the HFP...Pyrimidine complex (purple) compared to the individual molecules' spectra (pyrimidine, red; HFP blue) all at the M06-2X/aVTZ level of theory.

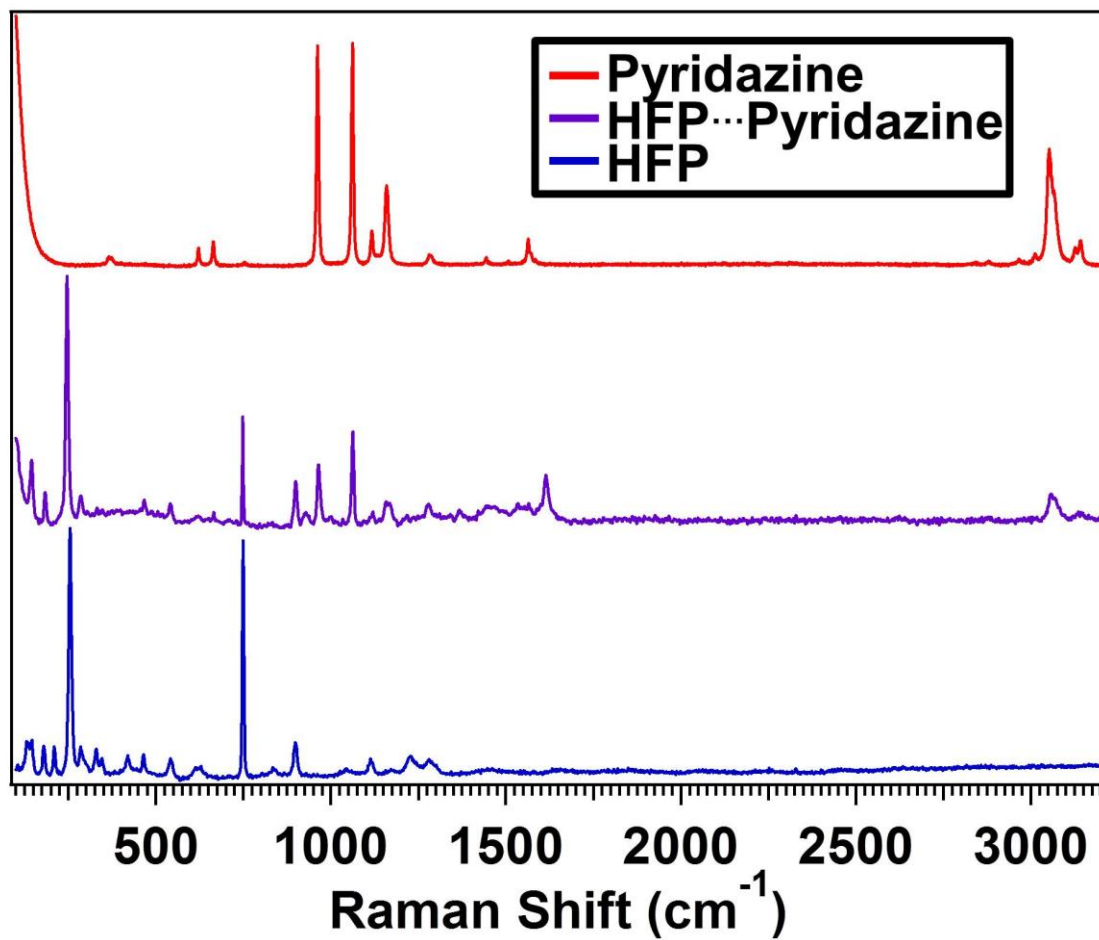

**Figure S8.** Raman spectrum of the HFP...Pyridazine complex (purple) compared to the individual molecules' spectra (pyridazine, red; HFP blue).

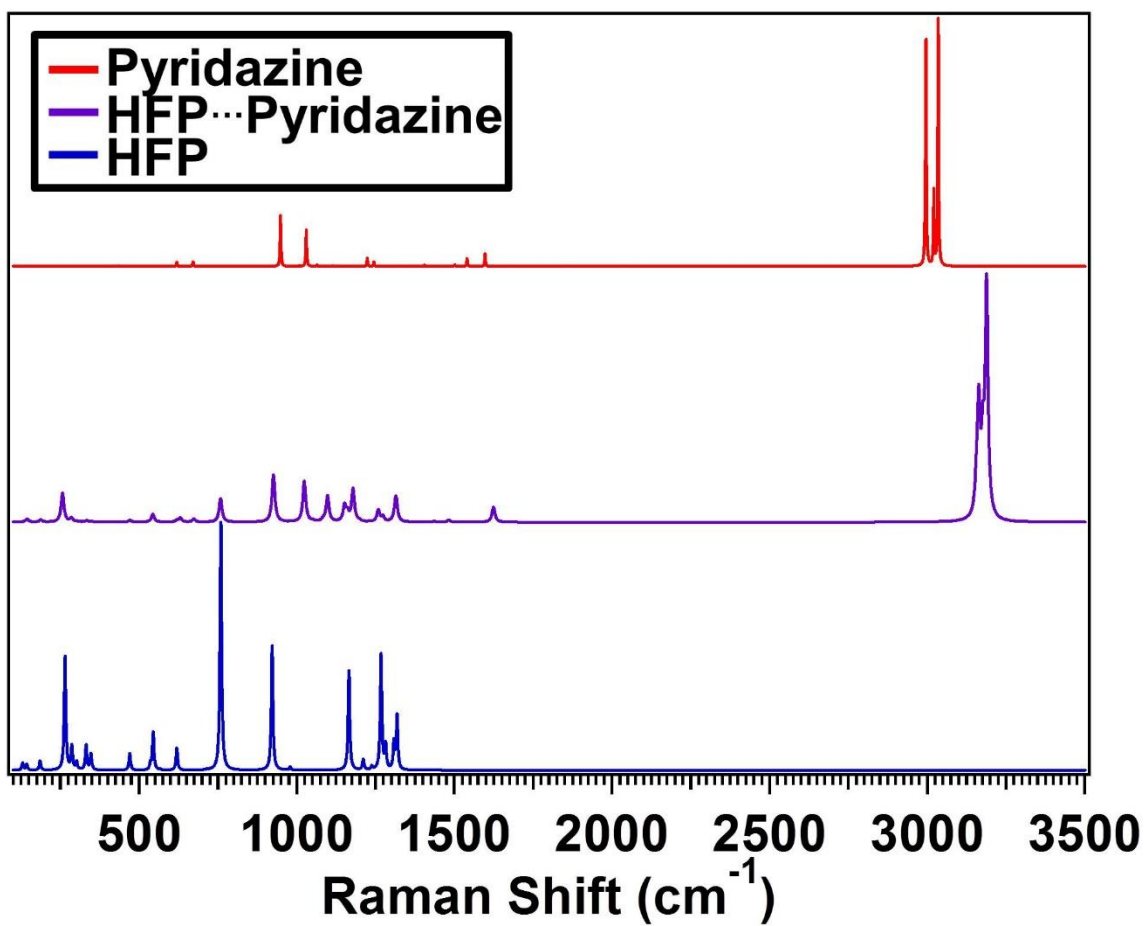

**Figure S9.** Theoretical Raman spectrum of the HFP...Pyridazine complex (purple) compared to the individual molecules' spectra (pyridazine, red; HFP blue) all at the M06-2X/aVTZ level of theory.

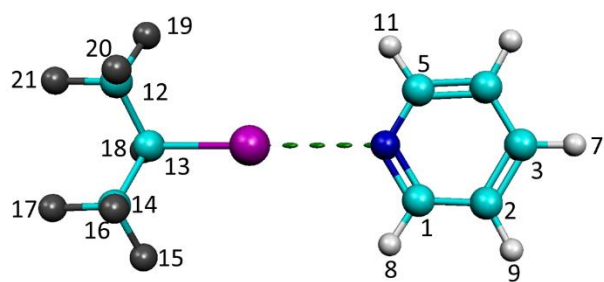

**(b) HFP...Pyridine**

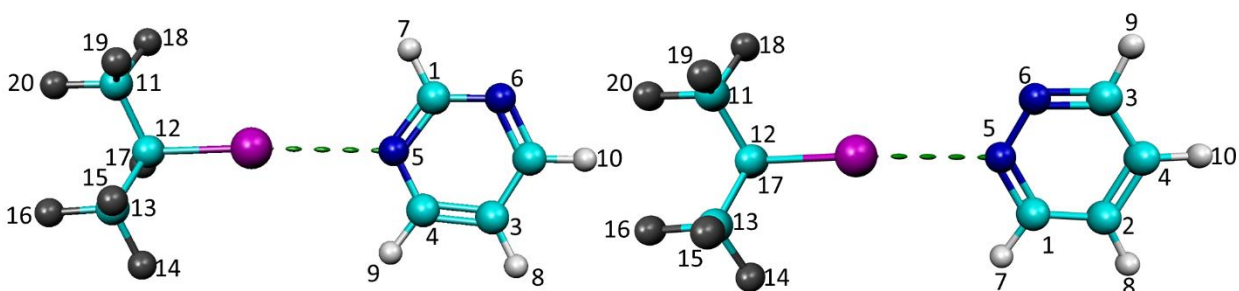

**(c) HFP...Pyrimidine**

**(d) HFP...Pyridazine**

**Figure S10.** Numbering of molecular structures used in Table 3, 4, and 5.



Table S8. Changes in natural electron configuration for atoms in the HFP...Pyridine complex in millielectrons (me-).

| Atom |    | $\Delta q$ (me <sup>-</sup> ) |
|------|----|-------------------------------|
| C    | 1  | 0                             |
| C    | 2  | -10                           |
| C    | 3  | -20                           |
| C    | 4  | -10                           |
| C    | 5  | 0                             |
| N    | 6  | 40                            |
| H    | 7  | -10                           |
| H    | 8  | -10                           |
| H    | 9  | 0                             |
| H    | 10 | 0                             |
| H    | 11 | -10                           |
| C    | 12 | 0                             |
| C    | 13 | 50                            |
| C    | 14 | 0                             |
| F    | 15 | 20                            |
| F    | 16 | 10                            |
| F    | 17 | 0                             |
| F    | 18 | 10                            |
| F    | 19 | 20                            |
| F    | 20 | 10                            |
| F    | 21 | 0                             |
| I    | 22 | -30                           |

Table S9. Changes in natural electron configuration for atoms in the HFP...Pyrimidine complex in millielectrons (me-).

|  | Atom |    | $\Delta q$ (me-) |
|--|------|----|------------------|
|  | C    | 1  | -20              |
|  | C    | 2  | 0                |
|  | C    | 3  | 10               |
|  | C    | 4  | -30              |
|  | N    | 5  | 40               |
|  | N    | 6  | -10              |
|  | H    | 7  | 0                |
|  | H    | 8  | -10              |
|  | H    | 9  | -10              |
|  | H    | 10 | 0                |
|  | C    | 11 | 0                |
|  | C    | 12 | 40               |
|  | C    | 13 | 0                |
|  | F    | 14 | 20               |
|  | F    | 15 | 10               |
|  | F    | 16 | 0                |
|  | F    | 17 | 20               |
|  | F    | 18 | 20               |
|  | F    | 19 | 10               |
|  | F    | 20 | 0                |
|  | I    | 21 | -40              |

Table S10. Changes in natural electron configuration for atoms in the HFP...Pyridazine complex in millielectrons (me-).

|  | Atom |    | $\Delta q$ (me <sup>-</sup> ) |
|--|------|----|-------------------------------|
|  | C    | 1  | -10                           |
|  | C    | 2  | 10                            |
|  | C    | 3  | -10                           |
|  | C    | 4  | 0                             |
|  | N    | 5  | 50                            |
|  | N    | 6  | -10                           |
|  | H    | 7  | -10                           |
|  | H    | 8  | -10                           |
|  | H    | 9  | -10                           |
|  | H    | 10 | -10                           |
|  | C    | 11 | 0                             |
|  | C    | 12 | 50                            |
|  | C    | 13 | 0                             |
|  | F    | 14 | 20                            |
|  | F    | 15 | 10                            |
|  | F    | 16 | 0                             |
|  | F    | 17 | 10                            |
|  | F    | 18 | 20                            |
|  | F    | 19 | 10                            |
|  | F    | 20 | 0                             |
|  | I    | 21 | -50                           |

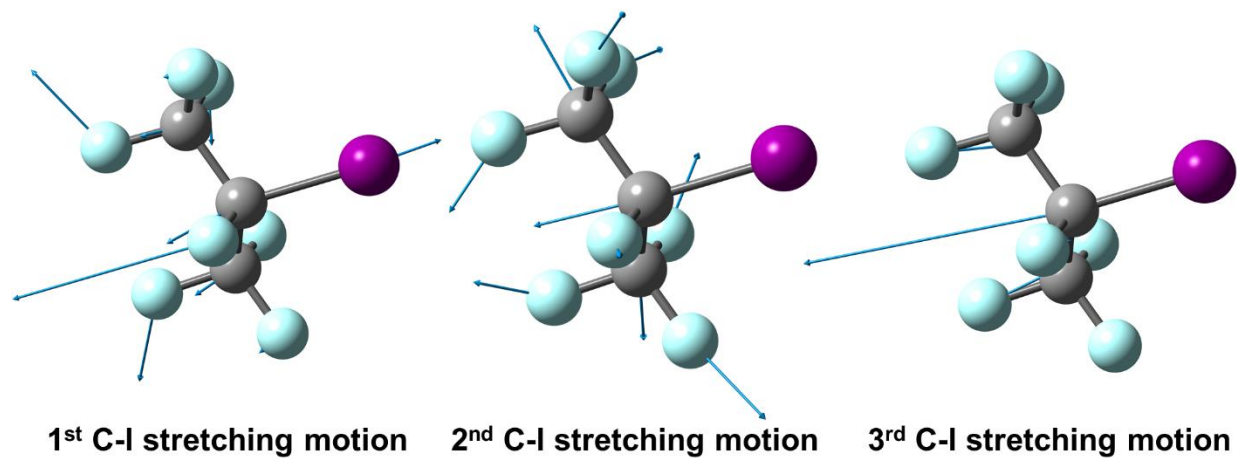

**Figure S11.** Displacement vectors of the stretching motions within the HFP molecule.
